# Supplementary material
Source: PubMed Central journal article supplement (PMC4331109)
Supplement: NIHMS661859-supplement-Supp_Table_6.pdf [file NIHMS661859-supplement-Supp_Table_6.pdf]

**Supplementary Table 6.** Korean replication data for the 140 loci identified in the Caucasian GWAS studies on Crohn's disease

| Nearby Gene      | Locus       |       |             | ImmunoChIP  |                |      |             |                | Validation  |                |      |             |                | Combined      |
|------------------|-------------|-------|-------------|-------------|----------------|------|-------------|----------------|-------------|----------------|------|-------------|----------------|---------------|
|                  | SNP         | Chr.  | Position    | Risk allele | RAF in control | OR   | 95% CI      | <i>P</i> value | Risk allele | RAF in control | OR   | 95% CI      | <i>P</i> value | <i>P</i> cmh* |
| <i>(RNASET2)</i> | rs1819333§  | 6q27  | 167,373,547 | T           | 0.40           | 1.21 | (1.02-1.43) | 2.55E-02       | T           | 0.37           | 1.35 | (1.19-1.54) | 7.44E-06       | 1.08E-06      |
| <i>(ZNF365)</i>  | rs224143†§¶ | 10q21 | 64,477,836  | G           | 0.60           | 1.36 | (1.15-1.60) | 3.31E-04       | G           | 0.59           | 1.37 | (1.20-1.56) | 3.24E-06       | 2.20E-09      |
| <i>(NKX2-3)</i>  | rs4409764§¶ | 10q24 | 101,284,237 | T           | 0.46           | 1.24 | (1.05-1.47) | 1.18E-02       | T           | 0.45           | 1.39 | (1.22-1.59) | 7.40E-07       | 7.93E-08      |
| <i>PRKCB</i>     | rs7404095§  | 16p11 | 23,864,590  | C           | 0.56           | 1.28 | (1.08-1.51) | 3.80E-03       | C           | 0.58           | 1.26 | (1.11-1.44) | 4.35E-04       | 4.49E-06      |
| <i>(IKZF3)</i>   | rs12946510  | 17q21 | 37,912,377  | T           | 0.32           | 1.20 | (1.20-1.01) | 4.16E-02       | C           | 0.66           | 1.03 | (0.90-1.17) | 7.07E-01       | 3.41E-01      |
| <i>DNMT3B</i>    | rs4911259†  | 20q11 | 31,376,282  | T           | 0.09           | 1.49 | (1.12-1.98) | 5.68E-03       | T           | 0.10           | 1.07 | (0.87-1.32) | 5.36E-01       | 2.80E-02      |
| <i>(CD40)</i>    | rs1569723†  | 20q12 | 44,742,064  | C           | 0.34           | 1.21 | (1.02-1.44) | 2.89E-02       | C           | 0.36           | 1.11 | (0.97-1.26) | 1.36E-01       | 1.19E-02      |

Note: Chr, chromosome; CI, confidence interval; OR, odds ratio; Position, chromosome position (hg19); RAF, risk allele frequency.

\**P* cmh was calculated by Cochran-Mantel-Haenszel (CMH) test statistic (1 d.f.).

†Imputed SNPs.

§These SNPs passed the Bonferroni correction following the validation.

¶These SNPs have reached the genome-wide significance *P* value in the immunoChIP+validation set.
