# Supplementary material
Source: PubMed Central journal article supplement (PMC4331109)
Supplement: NIHMS661859-supplement-Suppl_Figure_2.pdf [file NIHMS661859-supplement-Suppl_Figure_2.pdf]

A

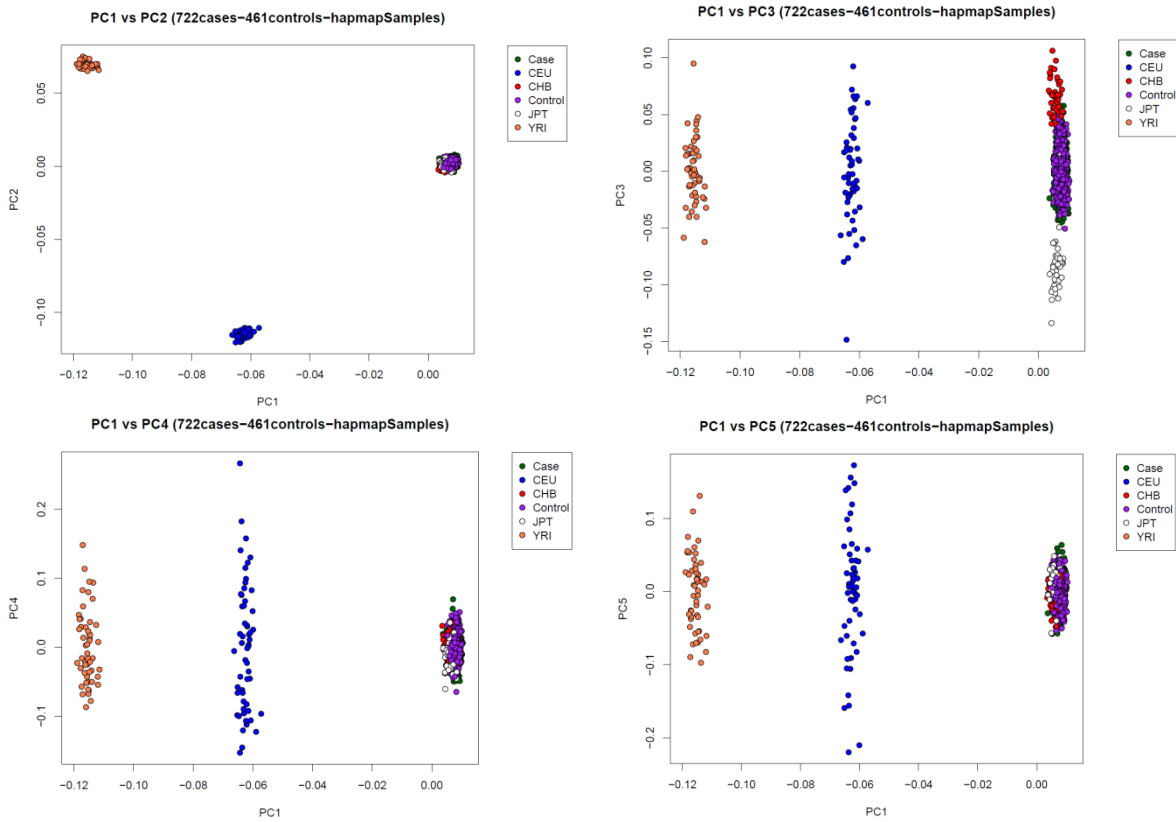

B

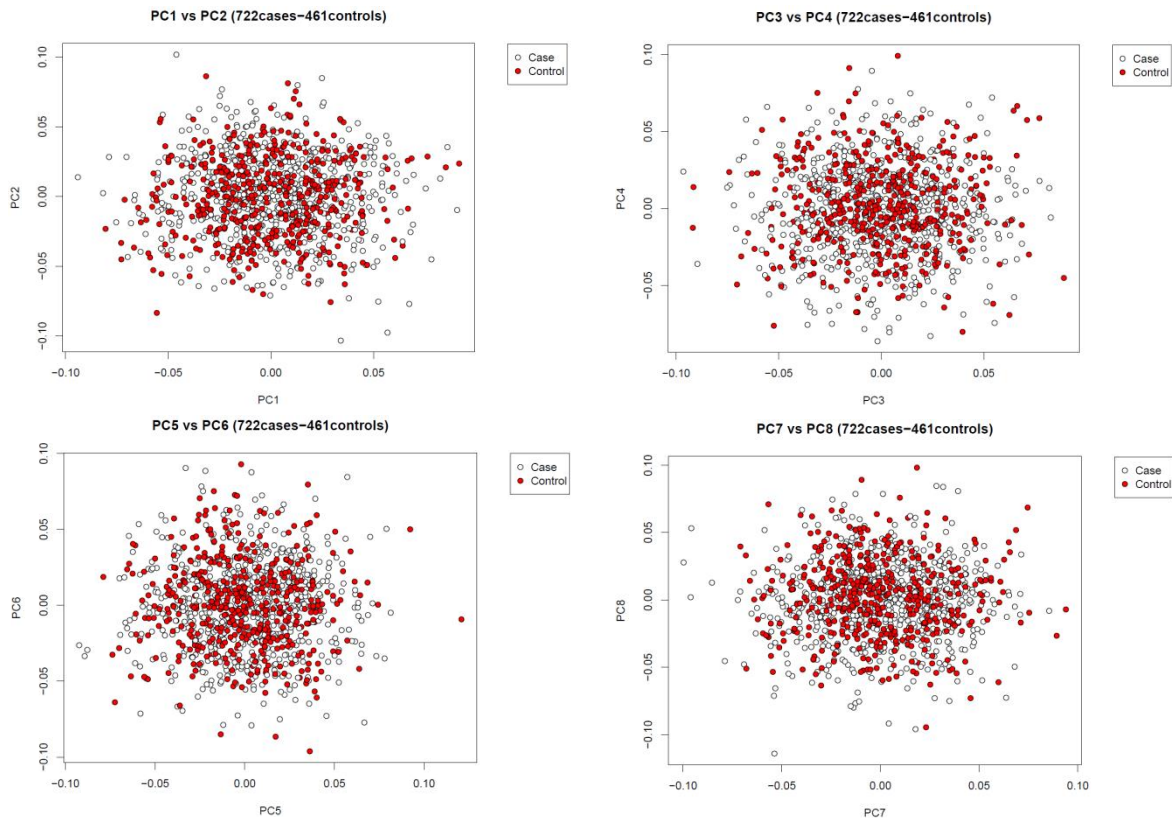

**Supplementary Figure 2.** A, Principal component analysis (PCA) of 1,183 samples and 194 reference DNA samples from HapMap. B, Plots of the first eight principal components from the PCA using 1,183 participant samples (722 cases, 461 controls).
