# Supplementary material
Source: PubMed Central journal article supplement (PMC4331109)
Supplement: NIHMS661859-supplement-Suppl_Figure_3.pdf [file NIHMS661859-supplement-Suppl_Figure_3.pdf]

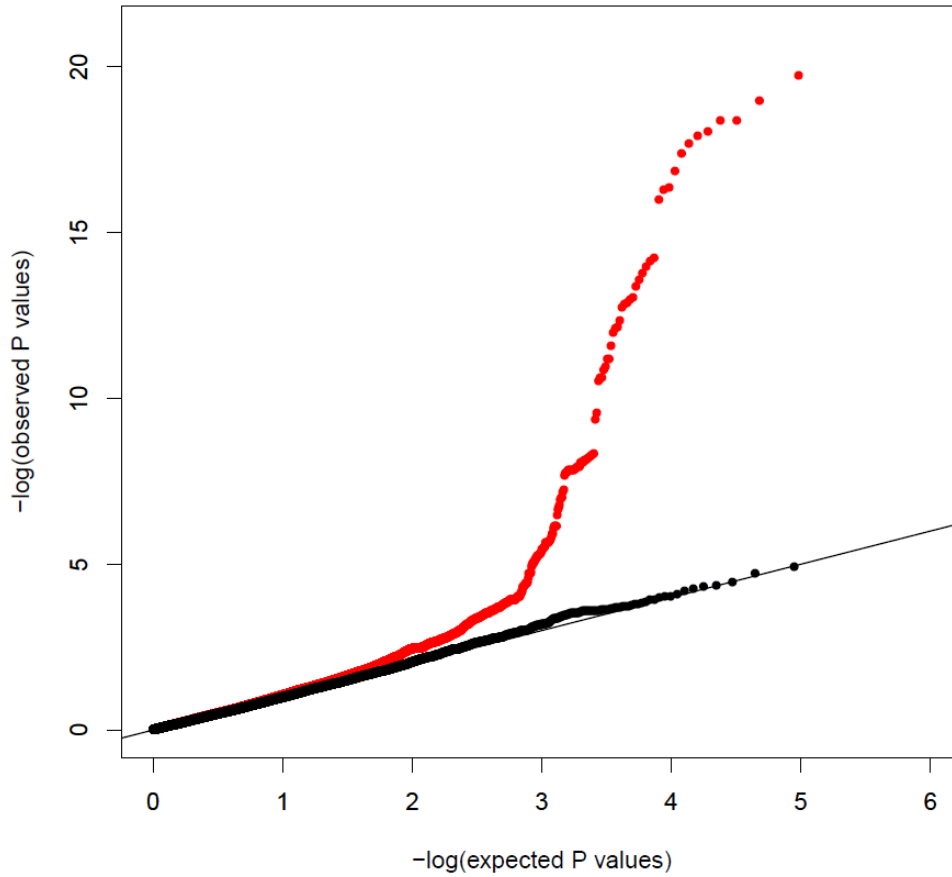

**Supplementary Figure 3.** Quantile-quantile plot for the ImmunoChip association  $P$  values of 96,048 markers in 722 cases and 461 controls.  $-\log_{10} P$  values corrected for residual inflation by genomic control were plotted against the expected null distribution. Red data points represent the inclusion of SNPs from the MHC locus; black data points represent the exclusion of the MHC and *TNFSF15* loci.
