# Supplementary material
Source: PubMed Central journal article supplement (PMC4331109)

**Supplementary Figure 4.** Regional association plots of the six loci identified. A, rs3749172 at 2q37; B, rs224143 at 10q21; C, rs1250569 at 10q22; D, rs4409764 at 10q24; E, rs514000 at 18p11; F, rs2823256 at 21q11. SNPs are plotted according to their chromosomal positions (hg19) with  $-\log_{10} P$  values from the ImmunoChip in the region flanking 400 kb on either side of the marker SNP. Genotyped SNPs are represented by circles and imputed SNPs are represented by squares. The  $-\log_{10} P$  values of the lead SNP were shown for the ImmunoChip (arrow). rs224143 (B) and rs4409764 (D) were selected as reported SNPs in Caucasian GWAS studies. rs2823256 (F) was selected as the proxy SNP of rs200642633 with an insertion/deletion variation ( $r^2=0.91$ ,  $D'=0.96$ ). LD ( $r^2$  values) between the lead SNP and the other SNPs are indicated by color. The estimated recombination rates from 1000 Genome Project (March 2012) ASN samples are plotted to reflect local LD structure. Plots were generated using LocusZoom (<http://csg.sph.umich.edu/locuszoom/>).

A

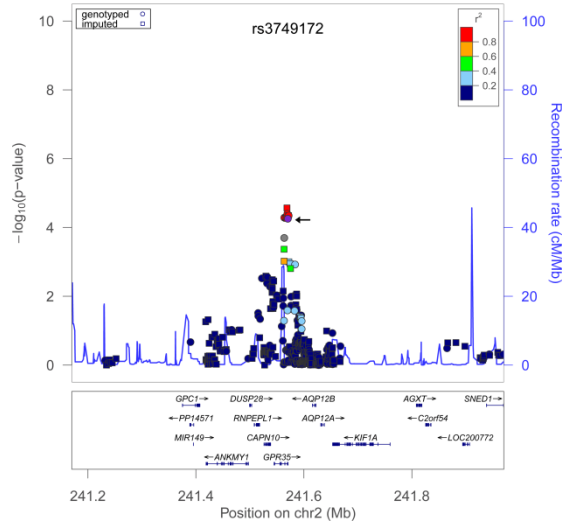

B

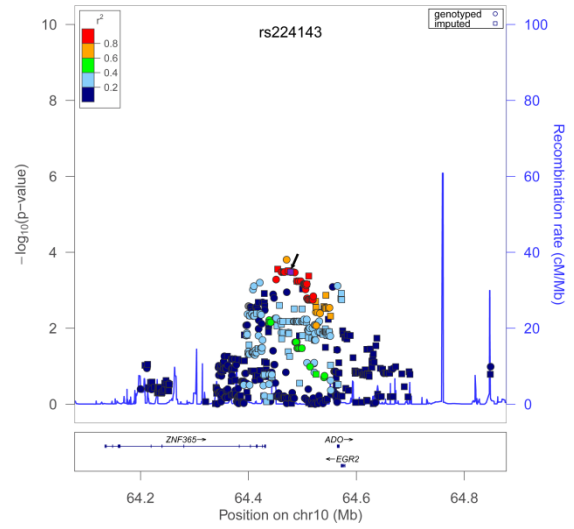

C

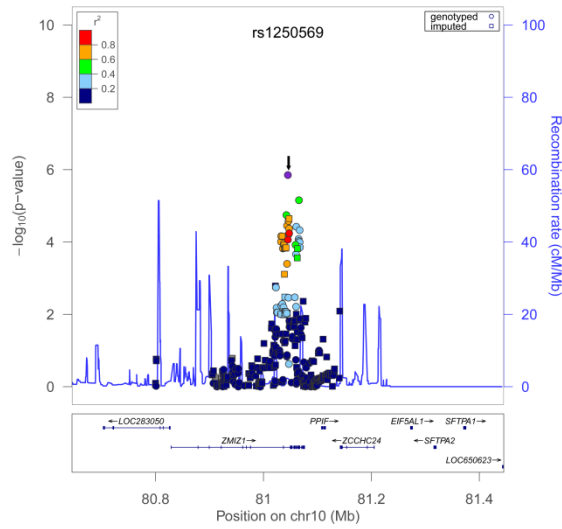

D

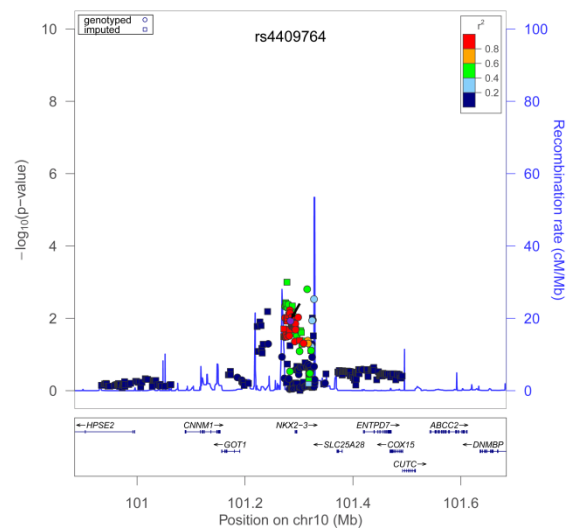

E

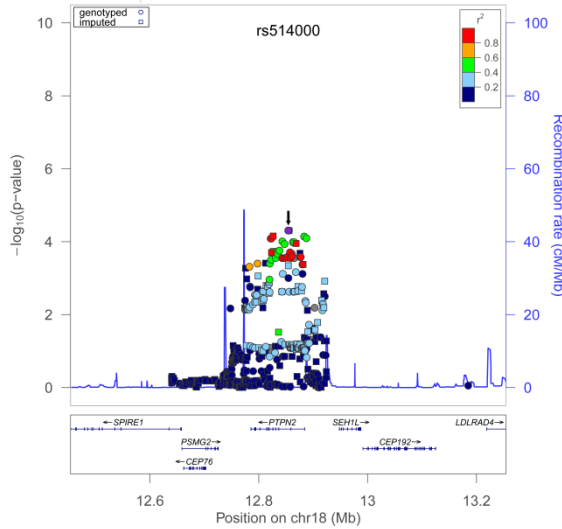

F

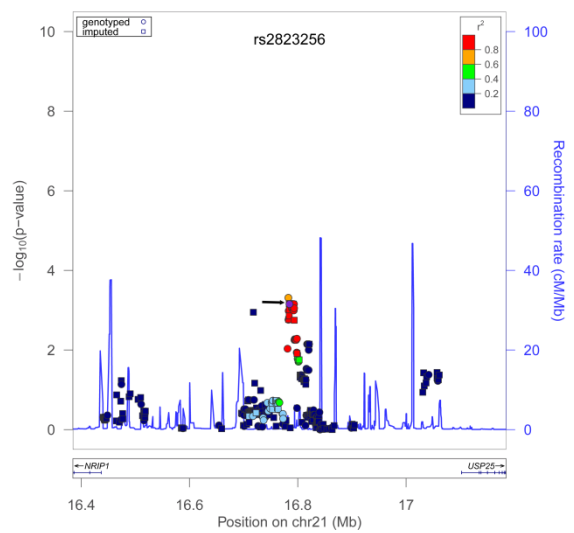

Supplement: NIHMS661859-supplement-Suppl_Figure_4.pdf [file NIHMS661859-supplement-Suppl_Figure_4.pdf]
