# Supplementary material
Source: PubMed Central journal article supplement (PMC4331109)
Supplement: NIHMS661859-supplement-Suppl_Table_1.pdf [file NIHMS661859-supplement-Suppl_Table_1.pdf]

**Supplementary Table 1. Clinical characteristics of the study subjects**

|                            | ImmunoChip |           | Replication cohort |           | Total       |           |
|----------------------------|------------|-----------|--------------------|-----------|-------------|-----------|
|                            | Case       | Control*  | Case               | Control*  | Case        | Control*  |
| No. of samples             | 722        | 461       | 948                | 977       | 1,670       | 1,438     |
| Male                       | 521 (72%)  | 213 (46%) | 694 (73%)          | 493 (50%) | 1,215 (73%) | 706 (49%) |
| Mean age at sampling (yr)  | 27.3±8.2   | 30.8±12.9 | 30.3±10.4          | NA        | 29.0±9.6    | 30.8±12.9 |
| Mean age at diagnosis (yr) | 24.3±7.7   |           | 25.9±9.8           |           | 25.2±9.0    |           |
| Age group at diagnosis     |            |           |                    |           |             |           |
| ≤16 yr                     | 75 (10%)   |           | 88 (9%)            |           | 163 (10%)   |           |
| 17-40 yr                   | 621 (86%)  |           | 779 (82%)          |           | 1,400 (84%) |           |
| >40 yr                     | 26 (4%)    |           | 81 (9%)            |           | 107 (6%)    |           |
| Disease location           |            |           |                    |           |             |           |
| Terminal ileum             | 140 (19%)  |           | 32 (21%)†          |           | 172 (20%)†  |           |
| Colon                      | 43 (6%)    |           | 3 (2%)†            |           | 46 (5%)†    |           |
| Ileocolon                  | 539 (75%)  |           | 121 (78%)†         |           | 660 (75%)†  |           |
| Disease behavior           |            |           |                    |           |             |           |
| Inflammatory               | 292 (40%)  |           | 72 (46%)†          |           | 364 (41%)†  |           |
| Stricturing                | 144 (20%)  |           | 24 (15%)†          |           | 168 (19%)†  |           |
| Penetrating                | 286 (40%)  |           | 60 (38%)†          |           | 346 (39%)†  |           |
| Perianal fistula           |            |           |                    |           |             |           |
| Yes                        | 414 (57%)  |           | 78 (50%)†          |           | 492 (56%)†  |           |
| No                         | 308 (43%)  |           | 78 (50%)†          |           | 386 (44%)†  |           |

\*Information on age was not available in 305 controls for the ImmunoChip and in 977 controls for the replication cohort.

†Information on the disease location and behavior was not available in 792 patients from the Korea Research Network for Crohn's Disease in the replication cohort.
