# Supplementary material
Source: PubMed Central journal article supplement (PMC4331109)
Supplement: NIHMS661859-supplement-Suppl_Table_2.pdf [file NIHMS661859-supplement-Suppl_Table_2.pdf]

**Supplementary Table 2.** Detailed results of the Immunochip study with Crohn's disease in Koreans

| SNP        | Chr   | Position (hg19) | Gene             | Risk allele | Non-risk allele | RAF in cases | RAF in controls | OR   | 95% CI      | P trend  |
|------------|-------|-----------------|------------------|-------------|-----------------|--------------|-----------------|------|-------------|----------|
| rs4676410  | 2q37  | 241,563,739     | <i>GPR35</i>     | A           | G               | 0.36         | 0.28            | 1.44 | (1.21-1.72) | 5.18E-05 |
| rs2975781  | 2q37  | 241,566,429     | <i>GPR35</i>     | C           | T               | 0.37         | 0.29            | 1.43 | (1.20-1.71) | 5.09E-05 |
| rs2975782  | 2q37  | 241,566,511     | <i>GPR35</i>     | C           | T               | 0.36         | 0.28            | 1.44 | (1.21-1.72) | 5.18E-05 |
| rs2975785  | 2q37  | 241,569,329     | <i>GPR35</i>     | A           | G               | 0.36         | 0.28            | 1.45 | (1.21-1.73) | 4.00E-05 |
| rs3749172  | 2q37  | 241,570,249     | <i>GPR35</i>     | A           | C               | 0.36         | 0.28            | 1.44 | (1.20-1.72) | 5.57E-05 |
| rs2975788  | 2q37  | 241,571,858     | ( <i>GPR35</i> ) | A           | G               | 0.38         | 0.29            | 1.44 | (1.21-1.71) | 4.52E-05 |
| rs3807563  | 7p12  | 50,566,390      | <i>DDC</i>       | C           | T               | 0.78         | 0.70            | 1.48 | (1.23-1.78) | 3.77E-05 |
| rs1470750  | 7p12  | 50,576,648      | <i>DDC</i>       | C           | G               | 0.77         | 0.69            | 1.48 | (1.22-1.78) | 3.79E-05 |
| rs10758669 | 9p24  | 4,981,602       | ( <i>JAK2</i> )  | C           | A               | 0.37         | 0.29            | 1.45 | (1.21-1.74) | 4.02E-05 |
| rs12573280 | 10p15 | 6,487,774       | <i>PRKCQ</i>     | A           | C               | 0.46         | 0.37            | 1.48 | (1.25-1.75) | 5.16E-06 |
| rs12248888 | 10p15 | 6,496,186       | <i>PRKCQ</i>     | C           | G               | 0.53         | 0.43            | 1.48 | (1.25-1.75) | 6.52E-06 |
| rs4750491  | 10p15 | 6,499,228       | <i>PRKCQ</i>     | T           | C               | 0.58         | 0.50            | 1.44 | (1.21-1.71) | 3.27E-05 |
| rs604663   | 10p15 | 6,504,126       | <i>PRKCQ</i>     | T           | C               | 0.52         | 0.43            | 1.44 | (1.22-1.70) | 2.09E-05 |
| rs678304   | 10p15 | 6,504,136       | <i>PRKCQ</i>     | C           | G               | 0.52         | 0.43            | 1.44 | (1.22-1.70) | 2.09E-05 |
| rs630516   | 10p15 | 6,506,947       | <i>PRKCQ</i>     | C           | G               | 0.62         | 0.54            | 1.41 | (1.19-1.67) | 7.78E-05 |
| rs2026432  | 10p15 | 6,507,603       | <i>PRKCQ</i>     | T           | C               | 0.47         | 0.38            | 1.46 | (1.23-1.73) | 1.33E-05 |
| rs7089504  | 10p15 | 6,516,327       | <i>PRKCQ</i>     | C           | T               | 0.53         | 0.43            | 1.47 | (1.24-1.74) | 1.00E-05 |
| rs3793729  | 10p15 | 6,522,506       | <i>PRKCQ</i>     | G           | A               | 0.52         | 0.43            | 1.47 | (1.24-1.74) | 8.87E-06 |
| rs1886050  | 10p15 | 6,523,125       | <i>PRKCQ</i>     | A           | G               | 0.47         | 0.38            | 1.45 | (1.22-1.72) | 1.63E-05 |
| rs2236379  | 10p15 | 6,527,143       | <i>PRKCQ</i>     | A           | G               | 0.47         | 0.38            | 1.45 | (1.22-1.72) | 1.68E-05 |
| rs587198   | 10p15 | 6,531,149       | <i>PRKCQ</i>     | C           | T               | 0.52         | 0.42            | 1.51 | (1.27-1.79) | 2.28E-06 |
| rs16918645 | 10q21 | 65,346,300      | <i>REEP3</i>     | A           | G               | 0.81         | 0.75            | 1.49 | (1.22-1.81) | 7.43E-05 |
| rs1250546  | 10q22 | 81,032,532      | <i>ZMIZI</i>     | A           | G               | 0.57         | 0.49            | 1.39 | (1.18-1.64) | 9.81E-05 |
| rs1250544  | 10q22 | 81,032,885      | <i>ZMIZI</i>     | G           | A               | 0.57         | 0.49            | 1.40 | (1.18-1.65) | 6.88E-05 |
| rs1250573  | 10q22 | 81,042,475      | <i>ZMIZI</i>     | G           | A               | 0.64         | 0.55            | 1.44 | (1.22-1.71) | 1.80E-05 |
| rs1892497  | 10q22 | 81,043,707      | <i>ZMIZI</i>     | C           | T               | 0.66         | 0.57            | 1.43 | (1.21-1.69) | 3.54E-05 |
| rs1250569  | 10q22 | 81,045,207      | <i>ZMIZI</i>     | T           | C               | 0.57         | 0.47            | 1.51 | (1.28-1.79) | 1.41E-06 |
| rs1250568  | 10q22 | 81,045,280      | <i>ZMIZI</i>     | T           | C               | 0.61         | 0.52            | 1.40 | (1.18-1.65) | 8.64E-05 |
| rs1250566  | 10q22 | 81,046,453      | <i>ZMIZI</i>     | G           | A               | 0.66         | 0.57            | 1.44 | (1.21-1.71) | 2.61E-05 |
| rs1250565  | 10q22 | 81,047,015      | <i>ZMIZI</i>     | G           | A               | 0.61         | 0.52            | 1.40 | (1.19-1.66) | 5.98E-05 |
| rs1250564  | 10q22 | 81,047,342      | <i>ZMIZI</i>     | A           | C               | 0.60         | 0.52            | 1.42 | (1.20-1.67) | 4.29E-05 |
| rs2802372  | 10q22 | 81,047,575      | <i>ZMIZI</i>     | A           | C               | 0.60         | 0.52            | 1.41 | (1.19-1.66) | 5.74E-05 |
| rs1782648  | 10q22 | 81,060,829      | <i>ZMIZI</i>     | G           | A               | 0.58         | 0.49            | 1.42 | (1.20-1.68) | 3.78E-05 |
| rs1250558  | 10q22 | 81,065,201      | <i>ZMIZI</i>     | G           | A               | 0.58         | 0.50            | 1.40 | (1.18-1.66) | 8.27E-05 |
| rs1272633  | 10q22 | 81,065,508      | <i>ZMIZI</i>     | C           | T               | 0.58         | 0.50            | 1.40 | (1.18-1.65) | 9.39E-05 |
| rs1250557  | 10q22 | 81,065,774      | <i>ZMIZI</i>     | G           | T               | 0.45         | 0.36            | 1.49 | (1.25-1.78) | 6.99E-06 |
| rs1250555  | 10q22 | 81,066,982      | <i>ZMIZI</i>     | C           | T               | 0.57         | 0.49            | 1.42 | (1.20-1.67) | 4.71E-05 |
| rs12294037 | 11q13 | 72,807,631      | <i>FCHSD2</i>    | T           | A               | 0.48         | 0.39            | 1.42 | (1.19-1.68) | 6.31E-05 |
| rs16939895 | 18p11 | 12,821,903      | <i>PTPN2</i>     | A           | G               | 0.39         | 0.31            | 1.41 | (1.19-1.68) | 8.20E-05 |
| rs547268   | 18p11 | 12,823,056      | <i>PTPN2</i>     | G           | T               | 0.39         | 0.31            | 1.41 | (1.19-1.68) | 8.20E-05 |
| rs3786158  | 18p11 | 12,843,275      | <i>PTPN2</i>     | G           | A               | 0.57         | 0.49            | 1.39 | (1.18-1.64) | 9.81E-05 |
| rs514000   | 18p11 | 12,854,072      | <i>PTPN2</i>     | C           | T               | 0.39         | 0.30            | 1.43 | (1.20-1.70) | 4.94E-05 |
| rs484020   | 18p11 | 12,855,440      | <i>PTPN2</i>     | G           | A               | 0.39         | 0.30            | 1.43 | (1.20-1.70) | 4.94E-05 |
| rs55982017 | 18p11 | 12,883,308      | <i>PTPN2</i>     | G           | A               | 0.58         | 0.49            | 1.40 | (1.18-1.65) | 7.19E-05 |
| rs12607710 | 18p11 | 12,887,485      | ( <i>PTPN2</i> ) | T           | C               | 0.56         | 0.47            | 1.39 | (1.18-1.64) | 8.05E-05 |
| rs131665   | 22q11 | 21,920,903      | <i>UBE2L3</i>    | G           | A               | 0.49         | 0.41            | 1.42 | (1.20-1.68) | 5.52E-05 |
| rs140489   | 22q11 | 21,921,294      | <i>UBE2L3</i>    | A           | G               | 0.49         | 0.41            | 1.42 | (1.20-1.68) | 5.52E-05 |
| rs140492   | 22q11 | 21,923,144      | <i>UBE2L3</i>    | C           | A               | 0.49         | 0.41            | 1.42 | (1.20-1.68) | 5.52E-05 |
| rs2256609  | 22q11 | 21,925,017      | <i>UBE2L3</i>    | G           | A               | 0.41         | 0.32            | 1.47 | (1.22-1.76) | 2.89E-05 |
| rs140498   | 22q11 | 21,927,064      | <i>UBE2L3</i>    | A           | G               | 0.49         | 0.41            | 1.42 | (1.20-1.68) | 5.52E-05 |
| rs140499   | 22q11 | 21,927,231      | <i>UBE2L3</i>    | T           | C               | 0.49         | 0.41            | 1.42 | (1.20-1.68) | 5.52E-05 |
| rs2266961  | 22q11 | 21,928,597      | <i>UBE2L3</i>    | G           | C               | 0.40         | 0.32            | 1.46 | (1.22-1.75) | 3.06E-05 |
| rs181360   | 22q11 | 21,928,916      | <i>UBE2L3</i>    | G           | T               | 0.49         | 0.41            | 1.42 | (1.20-1.68) | 5.52E-05 |
| rs181362   | 22q11 | 21,932,068      | <i>UBE2L3</i>    | T           | C               | 0.49         | 0.41            | 1.42 | (1.20-1.68) | 5.52E-05 |
| rs181363   | 22q11 | 21,932,264      | <i>UBE2L3</i>    | G           | A               | 0.49         | 0.41            | 1.42 | (1.20-1.68) | 5.52E-05 |
| rs181366   | 22q11 | 21,933,780      | <i>UBE2L3</i>    | T           | C               | 0.49         | 0.41            | 1.42 | (1.20-1.68) | 5.52E-05 |
| rs5754217  | 22q11 | 21,939,675      | <i>UBE2L3</i>    | T           | G               | 0.49         | 0.41            | 1.42 | (1.20-1.68) | 5.52E-05 |
| rs5998599  | 22q11 | 21,941,981      | <i>UBE2L3</i>    | G           | A               | 0.49         | 0.41            | 1.42 | (1.20-1.68) | 5.52E-05 |
| rs2283789  | 22q11 | 21,944,478      | <i>UBE2L3</i>    | G           | T               | 0.49         | 0.41            | 1.42 | (1.19-1.68) | 6.25E-05 |
| rs5998619  | 22q11 | 21,945,851      | <i>UBE2L3</i>    | A           | G               | 0.49         | 0.41            | 1.42 | (1.19-1.68) | 6.25E-05 |
| rs73166632 | 22q11 | 21,946,173      | <i>UBE2L3</i>    | G           | A               | 0.49         | 0.41            | 1.42 | (1.19-1.68) | 6.25E-05 |
| rs2070512  | 22q11 | 21,949,411      | <i>UBE2L3</i>    | C           | A               | 0.49         | 0.41            | 1.42 | (1.19-1.68) | 6.25E-05 |
| rs2283790  | 22q11 | 21,956,653      | <i>UBE2L3</i>    | G           | A               | 0.49         | 0.41            | 1.42 | (1.19-1.68) | 6.25E-05 |
| rs11089629 | 22q11 | 21,958,872      | <i>UBE2L3</i>    | G           | T               | 0.49         | 0.41            | 1.42 | (1.19-1.68) | 6.25E-05 |
| rs4821108  | 22q11 | 21,959,038      | <i>UBE2L3</i>    | C           | G               | 0.49         | 0.41            | 1.42 | (1.19-1.68) | 6.25E-05 |
| rs4821124  | 22q11 | 21,979,289      | ( <i>YDJC</i> )  | C           | T               | 0.40         | 0.32            | 1.43 | (1.20-1.72) | 8.53E-05 |

Note: Chr, chromosome; CI, confidence interval; OR, odds ratio; RAF, risk allele frequency.
