# Supplementary material
Source: PubMed Central journal article supplement (PMC4331109)
Supplement: NIHMS661859-supplement-Suppl_Table_3.pdf [file NIHMS661859-supplement-Suppl_Table_3.pdf]

**Supplementary Table 3.** Imputed results of the ImmunoChip study with Crohn's disease in Koreans

| SNP         | Chr   | Position (hg19) | Gene                    | Risk allele | Non-risk allele | RAF in cases | RAF in controls | OR   | 95% CI      | <i>P</i> trend |
|-------------|-------|-----------------|-------------------------|-------------|-----------------|--------------|-----------------|------|-------------|----------------|
| rs75323844  | 4q24  | 103,774,293     | <i>UBE2D3</i>           | T           | TC              | 0.60         | 0.52            | 1.42 | (1.19-1.69) | 8.51E-05       |
| rs73771645  | 6q22  | 106,016,785     | <i>PREP</i>             | T           | C               | 0.05         | 0.02            | 3.13 | (1.77-5.54) | 3.90E-05       |
| rs58761034  | 11p15 | 524,864         | ( <i>PTDSS2, RNHI</i> ) | G           | A               | 0.86         | 0.80            | 1.55 | (1.24-1.94) | 9.36E-05       |
| rs637304    | 11q14 | 85,685,166      | <i>PICALM</i>           | A           | G               | 0.30         | 0.23            | 1.51 | (1.24-1.83) | 4.31E-05       |
| rs600743    | 11q14 | 85,686,223      | <i>PICALM</i>           | A           | T               | 0.30         | 0.23            | 1.50 | (1.23-1.83) | 4.87E-05       |
| rs585820    | 11q14 | 85,696,670      | <i>PICALM</i>           | G           | A               | 0.30         | 0.22            | 1.51 | (1.24-1.84) | 3.94E-05       |
| rs670606    | 11q14 | 85,698,598      | <i>PICALM</i>           | G           | A               | 0.30         | 0.23            | 1.49 | (1.22-1.81) | 7.10E-05       |
| rs654194    | 11q14 | 85,700,000      | <i>PICALM</i>           | C           | A               | 0.30         | 0.23            | 1.49 | (1.22-1.81) | 7.10E-05       |
| rs595972    | 11q14 | 85,705,885      | <i>PICALM</i>           | G           | T               | 0.30         | 0.23            | 1.48 | (1.22-1.81) | 7.61E-05       |
| rs616555    | 11q14 | 85,710,180      | <i>PICALM</i>           | G           | A               | 0.30         | 0.23            | 1.48 | (1.22-1.80) | 8.10E-05       |
| rs28645497  | 17p13 | 5,042,241       | <i>USP6</i>             | A           | G               | 0.55         | 0.46            | 1.42 | (1.19-1.69) | 9.49E-05       |
| rs140200174 | 17p13 | 5,047,599       | <i>USP6</i>             | A           | ATATT           | 0.54         | 0.46            | 1.44 | (1.20-1.72) | 7.48E-05       |
| rs200642633 | 21q11 | 16,790,941      | ( <i>USP25</i> )        | C           | CA              | 0.78         | 0.70            | 1.49 | (1.22-1.82) | 9.98E-05       |
| rs72635015  | 21q21 | 27,451,908      | <i>APP</i>              | A           | T               | 0.22         | 0.15            | 1.59 | (1.27-1.99) | 4.95E-05       |
| rs11910285  | 21q21 | 27,458,446      | <i>APP</i>              | C           | T               | 0.22         | 0.15            | 1.59 | (1.27-1.99) | 4.95E-05       |

Note: Chr, chromosome; CI, confidence interval; OR, odds ratio; RAF, risk allele frequency.
