# Supplementary material
Source: PubMed Central journal article supplement (PMC4331109)
Supplement: NIHMS661859-supplement-Suppl_Table_5.pdf [file NIHMS661859-supplement-Suppl_Table_5.pdf]

**Supplementary Table 5.** Association results for the 140 previously reported Crohn's disease and inflammatory bowel disease loci in Koreans

| Chr                                                       | SNP        | Position<br>(hg19 (Mb)) | Key Genes<br>(+N additional in locus)                                  | Caucasian      | Korean         | Power* |
|-----------------------------------------------------------|------------|-------------------------|------------------------------------------------------------------------|----------------|----------------|--------|
|                                                           |            |                         |                                                                        | <i>P</i> value | <i>P</i> value |        |
| <b>Crohn's Disease-specific loci (30 loci)</b>            |            |                         |                                                                        |                |                |        |
| 1                                                         | rs17391694 | 78.62                   | (5)                                                                    | 2.96E-09       | NA             | –      |
| 1                                                         | rs6679677  | 114.3                   | <i>PTPN22, DCLRE1B</i> , (7)                                           | 2.03E-15       | NA             | –      |
| 1                                                         | rs3897478  | 120.45                  | <i>ADAM30</i> , (5)                                                    | 1.97E-11       | 4.05E-01       | 0.081  |
| 1                                                         | rs9286879  | 172.85                  | <i>FASLG, TNFSF18</i> , (0)                                            | 5.53E-22       | 6.06E-01       | 0.091  |
| 2                                                         | rs1728918  | 27.63                   | <i>UCN</i> , (23)                                                      | 4.86E-16       | –              | –      |
| 2                                                         | rs10865331 | 62.55                   | (3)                                                                    | 9.77E-10       | 7.62E-03       | 0.179  |
| 2                                                         | rs6716753  | 231.09                  | <i>SP140</i> , (5)                                                     | 1.17E-16       | NA             | –      |
| 2                                                         | rs12994997 | 234.15                  | <i>ATG16L1, INPP5D</i> , (7)                                           | 4.14E-70       | 1.99E-01       | 0.653  |
| 4                                                         | rs6837335  | 48.36                   | <i>TXK, TEC, SLC10A4</i> , (3)                                         | 1.75E-08       | 7.77E-01       | 0.157  |
| 4                                                         | rs13126505 | 102.86                  | (1)                                                                    | 1.84E-12       | NA             | –      |
| 5                                                         | rs10065637 | 55.43                   | <i>IL6ST, IL31RA</i> , (1)                                             | 3.68E-12       | –              | –      |
| 5                                                         | rs7702331  | 72.54                   | (4)                                                                    | 5.63E-10       | 4.40E-01       | 0.115  |
| 5                                                         | rs17695092 | 173.34                  | <i>CPEB4</i> , (2)                                                     | 4.68E-09       | 4.99E-01       | 0.084  |
| 6                                                         | rs12663356 | 21.42                   | (3)                                                                    | 4.01E-12       | 2.77E-01       | 0.173  |
| 6                                                         | rs9264942  | 31.27                   | <i>HLA-C, PSORS1C1, NFKBIL1, MICB</i> , (18)                           | 4.96E-28       | 5.77E-01       | 0.361  |
| 6                                                         | rs9491697  | 127.45                  | (3)                                                                    | 3.79E-10       | 3.63E-01       | 0.141  |
| 6                                                         | rs13204742 | 128.24                  | (2)                                                                    | 8.38E-15       | NA             | –      |
| 6                                                         | rs212388   | 159.49                  | <i>TAGAP</i> , (5)                                                     | 3.04E-14       | 2.93E-01       | 0.195  |
| 7                                                         | rs10486483 | 26.88‡                  | (2)                                                                    | 3.48E-08       | 3.60E-01       | 0.095  |
| 7                                                         | rs864745   | 28.17                   | <i>CREB5, JAZF1</i> , (1)                                              | 3.65E-09       | 9.66E-01       | 0.144  |
| 8                                                         | rs7015630  | 90.87                   | <i>RIPK2</i> , (4)                                                     | 1.42E-08       | 9.57E-01       | 0.100  |
| 8                                                         | rs6651252  | 129.56                  | (0)                                                                    | 1.45E-16       | 5.70E-01       | 0.110  |
| 13                                                        | rs3764147  | 44.45                   | <i>LACCI</i> , (3)                                                     | 2.19E-21       | 2.45E-01       | 0.377  |
| 15                                                        | rs16967103 | 38.89                   | <i>RASGRP1, SPRED1</i> , (2)                                           | 3.88E-09       | 3.89E-01       | 0.068  |
| 16                                                        | rs2066847  | 50.66                   | <i>NOD2, ADCY7</i> , (5)                                               | 5.86E-209      | NA             | –      |
| 17                                                        | rs2945412  | 25.84                   | <i>LGALS9, NOS2</i> , (3)                                              | 8.68E-17       | 3.44E-01       | 0.300  |
| 19                                                        | rs2024092  | 1.12                    | <i>GPX4, HMHA1</i> , (20)                                              | 8.26E-22       | 6.95E-02       | 0.271  |
| 19                                                        | rs4802307  | 46.85‡                  | (9)                                                                    | 2.00E-10       | 4.74E-01       | 0.073  |
| 19                                                        | rs516246   | 49.2                    | <i>DBP, SPHK2, IZUMO1, FUT2</i> , (22)                                 | 1.00E-15       | NA             | –      |
| 21                                                        | rs2284553  | 34.77                   | <i>IFNGR2, IFNAR1, IFNAR2, IL10RB, GART, TMEM50B</i> , (6)             | 2.14E-16       | 8.07E-01       | 0.243  |
| <b>Inflammatory Bowel Disease general loci (110 loci)</b> |            |                         |                                                                        |                |                |        |
| 1                                                         | rs12103    | 1.24                    | <i>TNFRSF18, TNFRSF4</i> , (30)                                        | 7.66E-13       | 6.02E-01       | 0.056  |
| 1                                                         | rs35675666 | 8.02                    | <i>TNFRSF9</i> , (6)                                                   | 1.12E-15       | 9.88E-01       | 0.096  |
| 1                                                         | rs12568930 | 22.7                    | (3)                                                                    | 1.26E-17       | 3.66E-01       | 0.133  |
| 1                                                         | rs11209026 | 67.68                   | <i>IL23R, IL12RB2</i> , (4)                                            | 8.12E-161      | NA             | –      |
| 1                                                         | rs2651244  | 70.99                   | (3)                                                                    | 2.29E-08       | 7.65E-01       | 0.051  |
| 1                                                         | rs4845604  | 151.79                  | <i>RORC</i> , (14)                                                     | 3.52E-16       | 7.04E-01       | 0.083  |
| 1                                                         | rs670523   | 155.67                  | <i>UBQLN4, RIT1, MSTO1</i> , (28)                                      | 5.79E-11       | 5.91E-01       | 0.070  |
| 1                                                         | rs4656958  | 160.85                  | <i>CD48, SLAMF1, ITLN1, CD244, F11R, USF1, SLAMF7, ARHGAP30</i> , (8)  | 6.80E-09       | 4.29E-01       | 0.098  |
| 1                                                         | rs1801274  | 161.47                  | <i>FCGR2A, FCGR2B, FCGR3A, HSPA6, FCGR3B, FCRLA</i> , (9)              | 2.12E-38       | 9.26E-01       | 0.225  |
| 1                                                         | rs2488389  | 197.6                   | <i>C1orf53</i> , (2)                                                   | 8.45E-13       | 9.58E-02       | 0.177  |
| 1                                                         | rs7554511  | 200.87                  | <i>KIF21B</i> , (6)                                                    | 1.24E-32       | NA             | –      |
| 1                                                         | rs3024505  | 206.93                  | <i>IL10, IL20, IL19, IL24, PIGR, MAPKAPK2, FAIM3, RASSF5</i> , (3)     | 6.66E-42       | 8.72E-01       | 0.092  |
| 2                                                         | rs6545800  | 25.12                   | <i>ADCY3</i> , (6)                                                     | 6.14E-16       | –              | –      |
| 2                                                         | rs925255   | 28.61                   | <i>FOSL2, BRE</i> , (1)                                                | 2.67E-15       | 3.96E-01       | 0.124  |
| 2                                                         | rs10495903 | 43.81                   | (5)                                                                    | 8.03E-12       | –              | –      |
| 2                                                         | rs7608910  | 61.2                    | <i>REL, C2orf74, KIAA1841, AHS2</i> , (6)                              | 8.65E-32       | 8.48E-01       | 0.106  |
| 2                                                         | rs6740462  | 65.67                   | <i>SPRED2</i> , (1)                                                    | 2.35E-08       | 1.35E-01       | 0.103  |
| 2                                                         | rs917997   | 102.86                  | <i>IL1R2, IL18RAP, IL18R1, IL1R1, IL1RL1, IL1RL2</i> , (3)             | 3.12E-20       | 8.25E-01       | 0.213  |
| 2                                                         | rs2111485  | 163.1                   | <i>IFIH1</i> , (5)                                                     | 1.93E-08       | 6.92E-01       | 0.087  |
| 2                                                         | rs1517352  | 191.92                  | <i>STAT1, STAT4</i> , (2)                                              | 3.28E-11       | 2.99E-01       | 0.142  |
| 2                                                         | rs2382817  | 219.14                  | <i>SLC11A1, CXCR2, CXCR1, PNKD, ARPC2, TMBIM1, CTDSP1</i> , (8)        | 3.70E-12       | 4.01E-01       | 0.133  |
| 2                                                         | rs3749171  | 241.57                  | <i>GPR35</i> , (12)                                                    | 3.07E-21       | 2.56E-02       | 0.133  |
| 3                                                         | rs4256159  | 18.76                   | (0)                                                                    | 9.00E-15       | 4.72E-01       | 0.136  |
| 3                                                         | rs3197999  | 48.96                   | <i>MST1, PFKFB4, MST1R, UCN2, GPX1, IP6K2, BSN, IP6K1, USP4</i> , (56) | 1.01E-47       | 3.19E-02       | 0.179  |

| Chr                                                       | SNP        | Position<br>(hg19 (Mb)) | Key Genes<br>(+N additional in locus)                              | Caucasian | Korean   | Power* |
|-----------------------------------------------------------|------------|-------------------------|--------------------------------------------------------------------|-----------|----------|--------|
|                                                           |            |                         |                                                                    | P value   | P value  |        |
| <b>Inflammatory Bowel Disease general loci (110 loci)</b> |            |                         |                                                                    |           |          |        |
| 4                                                         | rs2472649  | 74.85                   | <i>CXCL5,CXCL1,CXCL3,IL8,CXCL6,PF4,CXCL2,PF4V1,(3)</i>             | 2.57E-08  | –        | –      |
| 4                                                         | rs7657746  | 123.22                  | <i>IL2,IL21,(2)</i>                                                | 2.76E-13  | 6.36E-01 | 0.079  |
| 5                                                         | rs2930047  | 10.69                   | <i>DAP,(2)</i>                                                     | 1.03E-08  | 7.04E-02 | 0.101  |
| 5                                                         | rs11742570 | 40.38                   | <i>PTGER4,(1)</i>                                                  | 1.81E-82  | 7.92E-02 | 0.393  |
| 5                                                         | rs1363907  | 96.24                   | <i>ERAP2,ERAP1,LNPEP,(2)</i>                                       | 5.62E-13  | 8.07E-01 | 0.110  |
| 5                                                         | rs4836519  | 130.01                  | <i>(1)</i>                                                         | 4.24E-10  | –        | –      |
| 5                                                         | rs2188962  | 131.19                  | <i>IRF1,IL13,CSF2,SLC22A4,IL4,IL3,IL5,PDLIM4,SLC22A5,ACSL6,(8)</i> | 1.35E-52  | NA       | –      |
| 5                                                         | rs6863411  | 141.51                  | <i>SPRY4,NDFIP1,(5)</i>                                            | 3.59E-14  | 6.95E-01 | 0.153  |
| 5                                                         | rs11741861 | 150.27                  | <i>TNIP1,IRGM,ZNF300P1,(8)</i>                                     | 2.94E-37  | 4.71E-02 | 0.730  |
| 5                                                         | rs6871626  | 158.8                   | <i>IL12B,(3)</i>                                                   | 1.43E-42  | 1.65E-03 | 0.456  |
| 5                                                         | rs12654812 | 176.79                  | <i>DOK3,(17)</i>                                                   | 1.68E-08  | 1.07E-01 | 0.114  |
| 6                                                         | rs17119    | 14.71                   | <i>(0)</i>                                                         | 3.08E-11  | 1.52E-02 | 0.079  |
| 6                                                         | rs9358372  | 20.77                   | <i>(2)</i>                                                         | 8.66E-14  | 6.39E-01 | 0.171  |
| 6                                                         | rs1847472  | 90.96                   | <i>(1)</i>                                                         | 1.57E-10  | 4.54E-01 | 0.060  |
| 6                                                         | rs6568421  | 106.43                  | <i>(2)</i>                                                         | 8.24E-20  | NA       | –      |
| 6                                                         | rs3851228  | 111.82                  | <i>TRAF3IP2,FYN,REV3L,(2)</i>                                      | 1.08E-13  | NA       | –      |
| 6                                                         | rs6920220  | 138                     | <i>TNFAIP3,(1)</i>                                                 | 1.40E-21  | NA       | –      |
| 6                                                         | rs12199775 | 143.9                   | <i>PHACTR2,(5)</i>                                                 | 1.99E-08  | 4.22E-02 | 0.094  |
| 6                                                         | rs1819333  | 167.37                  | <i>CCR6,RPS6KA2,RNASET2,(3)</i>                                    | 6.76E-21  | 2.55E-02 | 0.149  |
| 7                                                         | rs1456896  | 50.245                  | <i>ZPBP,IKZF1,(4)</i>                                              | 7.28E-15  | 2.45E-01 | 0.169  |
| 7                                                         | rs9297145  | 98.75                   | <i>SMURF1,(6)</i>                                                  | 8.21E-12  | 6.25E-01 | 0.084  |
| 7                                                         | rs1734907  | 100.34                  | <i>EPO,(21)</i>                                                    | 1.67E-13  | –        | –      |
| 7                                                         | rs38904    | 116.89                  | <i>(6)</i>                                                         | 1.31E-08  | 8.54E-01 | 0.091  |
| 8                                                         | rs921720   | 126.53                  | <i>TRIB1,(1)</i>                                                   | 8.30E-20  | 2.44E-01 | 0.149  |
| 8                                                         | rs1991866  | 130.62                  | <i>(2)</i>                                                         | 1.65E-09  | –        | –      |
| 9                                                         | rs10758669 | 4.98                    | <i>JAK2,(4)</i>                                                    | 7.88E-45  | 4.02E-05 | 0.418  |
| 9                                                         | rs4743820  | 93.92                   | <i>NFIL3,(2)</i>                                                   | 3.60E-09  | 4.11E-01 | 0.095  |
| 9                                                         | rs4246905  | 117.6                   | <i>TNFSF8,TNFSF15,TNC,(2)</i>                                      | 2.80E-32  | 3.12E-16 | 0.315  |
| 9                                                         | rs10781499 | 139.32                  | <i>CARD9,PMPCA,SDCCAG3,INPP5E,(19)</i>                             | 4.38E-56  | 2.77E-01 | 0.460  |
| 10                                                        | rs12722515 | 6.08                    | <i>IL2RA,IL15RA,(6)</i>                                            | 3.76E-10  | 8.80E-01 | 0.104  |
| 10                                                        | rs1042058  | 30.72                   | <i>MAP3K8,(3)</i>                                                  | 5.93E-11  | 8.19E-01 | 0.137  |
| 10                                                        | rs11010067 | 35.3                    | <i>CREM,(3)</i>                                                    | 2.49E-25  | 6.27E-01 | 0.213  |
| 10                                                        | rs2790216  | 59.99                   | <i>CISD1,IPMK,(2)</i>                                              | 8.07E-09  | 1.99E-01 | 0.113  |
| 10                                                        | rs10761659 | 64.51                   | <i>(3)</i>                                                         | 6.37E-46  | 3.92E-02 | 0.332  |
| 10                                                        | rs2227564  | 75.67                   | <i>(13)</i>                                                        | 6.75E-10  | –        | –      |
| 10                                                        | rs1250546  | 81.03                   | <i>(5)</i>                                                         | 3.15E-18  | 9.81E-05 | 0.193  |
| 10                                                        | rs6586030  | 82.25                   | <i>TSPAN14,C10orf58,(4)</i>                                        | 9.24E-16  | –        | –      |
| 10                                                        | rs7911264  | 94.43                   | <i>(4)</i>                                                         | 2.98E-08  | 2.88E-01 | 0.099  |
| 10                                                        | rs4409764  | 101.28                  | <i>NKX2-3,(6)</i>                                                  | 1.03E-54  | 1.18E-02 | 0.508  |
| 11                                                        | rs907611   | 1.87                    | <i>TNNI2,LSP1,(17)</i>                                             | 2.70E-10  | 2.03E-01 | 0.095  |
| 11                                                        | rs10896794 | 58.33                   | <i>CNTF,LPXN,(8)</i>                                               | 6.80E-10  | 3.91E-01 | 0.107  |
| 11                                                        | rs11230563 | 60.77                   | <i>CD6,CD5,PTGDR2,(12)</i>                                         | 9.03E-13  | 4.07E-01 | 0.117  |
| 11                                                        | rs4246215  | 61.56                   | <i>C11orf9,FADS1,FADS2,(12)</i>                                    | 1.93E-15  | 2.52E-01 | 0.137  |
| 11                                                        | rs559928   | 64.12                   | <i>CCDC88B,RPS6KA4,TRPT1,FLRT1,(20)</i>                            | 4.19E-11  | 4.95E-01 | 0.126  |
| 11                                                        | rs2231884  | 65.65                   | <i>RELA,FOSL1,CTSW,SNX32,(22)</i>                                  | 2.91E-10  | –        | –      |
| 11                                                        | rs2155219  | 76.29                   | <i>(5)</i>                                                         | 4.24E-36  | 7.92E-01 | 0.382  |
| 11                                                        | rs6592362  | 87.12                   | <i>(1)</i>                                                         | 2.32E-08  | –        | –      |
| 11                                                        | rs630923   | 118.74                  | <i>CXCR5,(17)</i>                                                  | 7.07E-09  | 6.61E-01 | 0.066  |
| 12                                                        | rs11612508 | 12.65                   | <i>LOH12CRI,(8)</i>                                                | 1.06E-08  | 8.50E-01 | 0.069  |
| 12                                                        | rs11564258 | 40.77                   | <i>LRRK2,MUC19</i>                                                 | 6.38E-29  | 7.39E-01 | 0.242  |
| 12                                                        | rs11168249 | 48.2                    | <i>VDR,(8)</i>                                                     | 7.78E-09  | 1.94E-01 | 0.060  |
| 12                                                        | rs7134599  | 68.49                   | <i>IFNG,IL26,IL22,(1)</i>                                          | 8.51E-32  | NA       | –      |
| 13                                                        | rs17085007 | 27.52                   | <i>(2)</i>                                                         | 2.79E-19  | 5.92E-01 | 0.154  |
| 13                                                        | rs941823   | 40.86                   | <i>(3)</i>                                                         | 2.07E-14  | 1.53E-01 | 0.082  |
| 13                                                        | rs9557195  | 99.95                   | <i>GPR183,GPR18,(6)</i>                                            | 2.37E-14  | 7.70E-01 | 0.090  |
| 14                                                        | rs194749   | 69.27                   | <i>ZFP36L1,(4)</i>                                                 | 2.70E-10  | 3.10E-01 | 0.124  |
| 14                                                        | rs4899554  | 75.7                    | <i>FOS,MLH3,(6)</i>                                                | 2.71E-08  | –        | –      |

| Chr                                                       | SNP        | Position<br>(hg19 (Mb)) | Key Genes<br>(+N additional in locus)              | Caucasian | Korean   | Power* |
|-----------------------------------------------------------|------------|-------------------------|----------------------------------------------------|-----------|----------|--------|
|                                                           |            |                         |                                                    | P value   | P value  |        |
| <b>Inflammatory Bowel Disease general loci (110 loci)</b> |            |                         |                                                    |           |          |        |
| 14                                                        | rs8005161  | 88.47                   | <i>GPR65,GALC,(1)</i>                              | 2.35E-14  | 6.51E-01 | 0.224  |
| 15                                                        | rs17293632 | 67.43                   | <i>SMAD3,(2)</i>                                   | 5.97E-16  | 1.77E-01 | 0.056  |
| 15                                                        | rs7495132  | 91.17                   | <i>CRTC3,(3)</i>                                   | 9.48E-11  | 1.13E-01 | 0.141  |
| 16                                                        | rs529866   | 11.54                   | <i>SOCS1,LITAF,RMI2,(10)</i>                       | 1.73E-16  | 1.00E-01 | 0.077  |
| 16                                                        | rs7404095  | 23.86                   | <i>PRKCB,(5)</i>                                   | 9.68E-10  | 3.80E-03 | 0.105  |
| 16                                                        | rs26528    | 28.6                    | <i>RABEP2,IL27,EIF3C,SULT1A1,SULT1A2,NUPRI,(9)</i> | 9.65E-22  | 4.46E-01 | 0.187  |
| 16                                                        | rs10521318 | 86                      | <i>IRF8,(4)</i>                                    | 1.41E-09  | -        | -      |
| 17                                                        | rs3091316  | 32.59                   | <i>CCL13,CCL2,CCL11,(4)</i>                        | 1.22E-26  | 8.14E-01 | 0.258  |
| 17                                                        | rs12946510 | 37.91                   | <i>IKZF3,ZBP2,GSDMB,ORMDL3,GSDMA,(12)</i>          | 4.10E-38  | 4.16E-02 | 0.372  |
| 17                                                        | rs12942547 | 40.53                   | <i>STAT3,STAT5B,STAT5A,(13)</i>                    | 5.51E-22  | 1.39E-01 | 0.194  |
| 17                                                        | rs1292053  | 57.96                   | <i>TUBD1,RPS6KB1,(9)</i>                           | 8.85E-13  | 8.05E-01 | 0.130  |
| 18                                                        | rs1893217  | 12.8                    | <i>(6)</i>                                         | 3.05E-26  | 3.69E-03 | 0.240  |
| 18                                                        | rs7240004  | 46.39                   | <i>SMAD7,(2)</i>                                   | 1.31E-09  | 6.88E-01 | 0.100  |
| 18                                                        | rs727088   | 67.53                   | <i>CD226,(2)</i>                                   | 4.65E-09  | 5.79E-01 | 0.125  |
| 19                                                        | rs11879191 | 10.49                   | <i>TYK2,PPAN-P2RY11,ICAM1,(25)</i>                 | 2.04E-18  | 8.06E-01 | 0.315  |
| 19                                                        | rs17694108 | 33.73                   | <i>CEBPG,(8)</i>                                   | 5.85E-15  | 1.78E-01 | 0.179  |
| 19                                                        | rs11672983 | 55.38                   | <i>NLRP7,NLRP2,KIR2DL1,LILRB4,(15)</i>             | 6.50E-11  | 3.29E-01 | 0.146  |
| 20                                                        | rs6142618† | 30.75                   | <i>HCK,(10)</i>                                    | 6.05E-10  | NA       | -      |
| 20                                                        | rs4911259  | 31.37                   | <i>DNMT3B,(8)</i>                                  | 1.20E-09  | 5.68E-03 | 0.079  |
| 20                                                        | rs1569723  | 44.74                   | <i>CD40,MMP9,PLTP,(11)</i>                         | 9.95E-14  | 2.89E-02 | 0.166  |
| 20                                                        | rs913678   | 48.95                   | <i>CEBPB,(5)</i>                                   | 4.59E-08  | 3.60E-01 | 0.090  |
| 20                                                        | rs259964   | 57.82                   | <i>ZNF831,CTSZ,(5)</i>                             | 1.01E-12  | 2.78E-01 | 0.083  |
| 20                                                        | rs6062504  | 62.34                   | <i>TNFRSF6B,LIME1,SLC2A4RG,ZGPAT,(23)</i>          | 1.09E-23  | 3.20E-01 | 0.199  |
| 21                                                        | rs2823286  | 16.81                   | <i>(0)</i>                                         | 9.28E-30  | 7.25E-03 | 0.226  |
| 21                                                        | rs2836878  | 40.46                   | <i>(3)</i>                                         | 4.62E-48  | 4.20E-01 | 0.339  |
| 21                                                        | rs7282490  | 45.62                   | <i>ICOSLG,(9)</i>                                  | 2.35E-26  | 8.96E-01 | 0.213  |
| 22                                                        | rs2266959  | 21.92                   | <i>MAPK1,YDJC,UBE2L3,RIMBP3,CCDC116,(8)</i>        | 1.39E-16  | 1.06E-04 | 0.200  |
| 22                                                        | rs2412970  | 30.43                   | <i>LIF,OSM,MTMR3,(8)</i>                           | 2.70E-14  | 6.14E-01 | 0.133  |
| 22                                                        | rs2413583  | 39.69                   | <i>ATF4,TAB1,APOBEC3G,(16)</i>                     | 4.40E-33  | 2.54E-01 | 0.156  |

Note: Chr, chromosome; Position, chromosome position (hg19); NA, monomorphic in Korean; -, data is not available.

\*Power of published 140 loci in our Immunochip discovery was analyzed using Quanto (<http://hyda.usc.edu/gxel>).
