# Supplementary material
Source: PubMed Central journal article supplement (PMC4331109)
Supplement: NIHMS661859-supplement-Suppl_Table_7.pdf [file NIHMS661859-supplement-Suppl_Table_7.pdf]

**Supplementary Table 7.** The percentage of genetic variance explained by 13 SNPs identified in Korean Crohn's disease

| Chr   | SNP        | Position    | Gene(s)                     | Alleles |          | RAF  |         |      | 95% CI      | $P_{\text{trend}}$ | Additive genetic variance explained |
|-------|------------|-------------|-----------------------------|---------|----------|------|---------|------|-------------|--------------------|-------------------------------------|
|       |            |             |                             | Risk    | Non-risk | Case | Control | OR   |             |                    |                                     |
| 1p31  | rs76418789 | 67,648,596  | <i>IL23R</i>                | G       | A        | 0.96 | 0.94    | 1.68 | (1.14-2.47) | 8.20E-03           | 0.19%                               |
| 2q37  | rs3749172  | 241,570,249 | <i>GPR35</i>                | A       | C        | 0.36 | 0.28    | 1.44 | (1.20-1.72) | 5.57E-05           | 0.35%                               |
| 6p21  | rs10947261 | 32,373,232  | <i>BTNL2</i>                | T       | G        | 0.36 | 0.29    | 1.40 | (1.17-1.68) | 2.38E-04           | 0.30%                               |
| 6p21  | rs9271366  | 32,586,854  | <i>(HLA-DRB1, HLA-DQA1)</i> | A       | G        | 0.94 | 0.89    | 1.96 | (1.46-2.64) | 5.34E-06           | 0.55%                               |
| 6p21  | rs751728   | 33,764,033  | <i>MLN</i>                  | T       | C        | 0.78 | 0.74    | 1.26 | (1.04-1.53) | 1.80E-02           | 0.13%                               |
| 6q27  | rs2149085  | 167,371,110 | <i>(RNASET2)</i>            | T       | C        | 0.44 | 0.40    | 1.20 | (1.02-1.42) | 3.20E-02           | 0.10%                               |
| 9q32  | rs6478108  | 117,558,703 | <i>TNFSF15</i>              | T       | C        | 0.71 | 0.51    | 2.48 | (2.06-2.97) | 1.15E-23           | 2.54%                               |
| 10q21 | rs224143   | 64,477,836  | <i>(ZNF365)</i>             | G       | A        | 0.67 | 0.60    | 1.36 | (1.15-1.60) | 3.31E-04           | 0.29%                               |
| 10q22 | rs1250569  | 81,045,207  | <i>ZMIZ1</i>                | T       | C        | 0.57 | 0.47    | 1.51 | (1.28-1.79) | 1.41E-06           | 0.54%                               |
| 10q24 | rs4409764  | 101,284,237 | <i>(NKX2-3)</i>             | T       | G        | 0.51 | 0.46    | 1.24 | (1.05-1.47) | 1.18E-02           | 0.15%                               |
| 11q13 | rs11235667 | 72,863,697  | <i>(ATG16L2, FCHSD2)</i>    | G       | A        | 0.13 | 0.09    | 1.54 | (1.17-2.03) | 2.10E-03           | 0.20%                               |
| 18p11 | rs514000   | 12,854,072  | <i>PTPN2</i>                | C       | T        | 0.39 | 0.30    | 1.43 | (1.20-1.70) | 4.94E-05           | 0.35%                               |
| 21q11 | rs2823256  | 16,784,706  | <i>(NR1P1, USP25)</i>       | G       | A        | 0.75 | 0.69    | 1.38 | (1.14-1.66) | 7.01E-04           | 0.28%                               |

Note: Chr, chromosome; CI, confidence interval; OR, odds ratio; Position, chromosome position (hg19); RAF, risk allele frequency.
