# Supplementary material
Source: PubMed Central journal article supplement (PMC4331109)

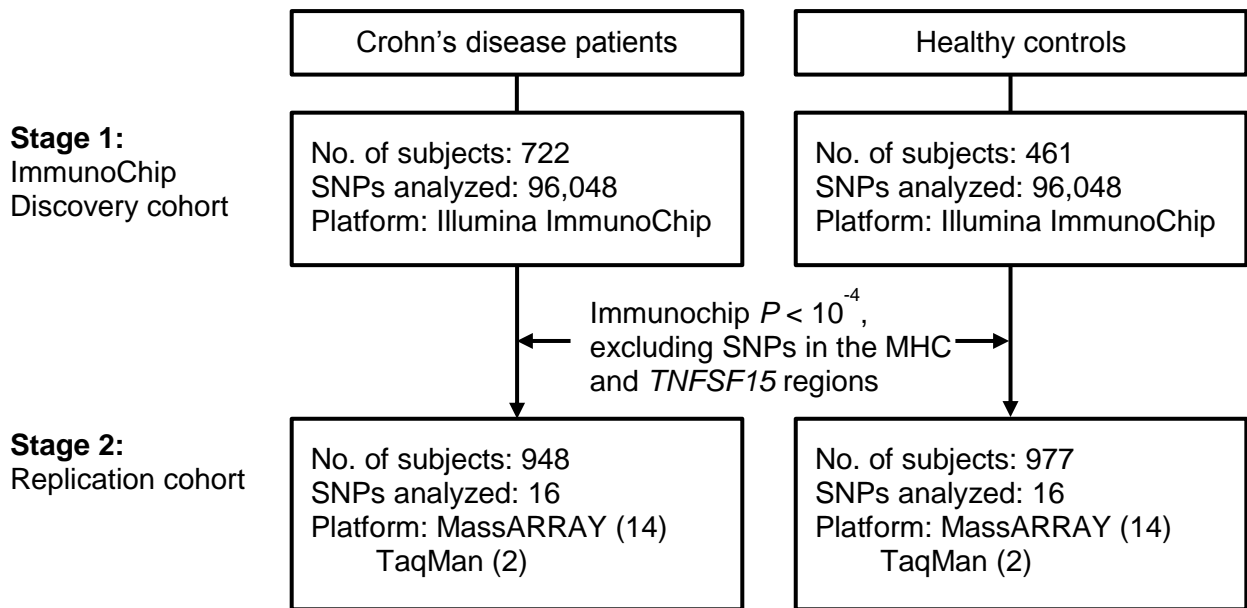

**Supplementary Figure 1.** Flowchart of study procedures.

Supplement: NIHMS661859-supplement-Suppl_Figure_1.pdf [file NIHMS661859-supplement-Suppl_Figure_1.pdf]
